# Supplementary material for: Revisiting the roles of dopants in g-C3N4nanostructures for piezo-photocatalytic production of H2O2: a case study of selenium and sulfur
Source: Royal Society of Chemistry journal article supplement (doi:10.1039/d2na00909a), 2023-01-01
Supplement: d2na00909a1.pdf [file d2na00909a1.pdf]

## Supporting Information

### Revisiting the Roles of Dopant on g-C<sub>3</sub>N<sub>4</sub> Nanostructures for Piezo- photocatalytic Production of H<sub>2</sub>O<sub>2</sub>: A Case Study of Selenium and Sulfur

Dat Do Tran<sup>1,2,3,+</sup>, Hoai-Thanh Vuong<sup>1,2,3,4,+</sup>, Duc-Viet Nguyen<sup>1,2,3,5</sup>, Pho Phuong Ly<sup>1,2,3</sup>,  
Pham Duc Minh Phan<sup>1,2,3</sup>, Vu Hoang Khoi<sup>1,2,3,5</sup>, Phong Thanh Mai<sup>1,2,3</sup>, and Nguyen Huu  
Hieu<sup>1,2,3,\*</sup>

<sup>1</sup>VNU-HCM, Key Laboratory of Chemical Engineering and Petroleum Processing (Key  
CEPP Lab), Ho Chi Minh City University of Technology (HCMUT), 268 Ly Thuong Kiet  
Street, District 10, Ho Chi Minh City, Vietnam

<sup>2</sup>Faculty of Chemical Engineering, Ho Chi Minh City University of Technology  
(HCMUT)

268 Ly Thuong Kiet Street, District 10, Ho Chi Minh City, Vietnam

<sup>3</sup>Vietnam National University Ho Chi Minh City (VNU-HCM), Linh Trung Ward, Thu  
Duc City, Ho Chi Minh City, Vietnam

<sup>4</sup> Department of Chemistry and Biochemistry, University of California Santa Barbara  
(UCSB), Santa Barbara, California 93106, USA

<sup>5</sup>School of Chemical Engineering, University of Ulsan, Ulsan, South Korea

\*Corresponding author's contact: [nhhieubk@hcmut.edu.vn](mailto:nhhieubk@hcmut.edu.vn)

## Materials

Melamine ( $C_3H_6N_6$ ), urea ( $CH_4N_2O$ ), thiourea ( $SC(NH_2)_2$ ), sulfur powder (S powder), selenium powder (Se powder), selenium dioxide ( $SeO_2$ ), isopropanol (IPA), potassium iodide (KI), potassium hydrogen phthalate ( $C_8H_5KO_4$ ), ammonium chloride ( $NH_4Cl$ ), benzoquinone (BQ), and methanol ( $CH_3OH$ ), were purchased from Xilong Scientific, China. Distilled water was used in the whole research. All chemicals were directly utilized without any purifications. The fabricated materials were named SCN, p-SCN, p-SeCN, and SeCN for the use of thiourea, sulfur powder, selenium powder, and  $SeO_2$  as doping precursors, respectively. g- $C_3N_4$  was prepared by the same method without the presence of other agents and denoted as GCN.

## Characterization

The optical features of all materials were computed by UV-vis diffuse reflectance spectroscopy (UV-DRS). The characteristic crystal structure of materials was characterized by X-ray diffraction (XRD). The morphologies of materials were also examined by field emission scanning electron microscopy (FESEM) and high-resolution transmission electron microscopy (HRTEM). Furthermore, the surface charge and conductivity of the materials were detected by zeta potential measurements. The BET and Barret-Joyner-Halender (BJH) methods were carried out using  $N_2$  adsorption-desorption measurements to determine the specific surface area, pore size, and pore volume of all samples. Thermogravimetric analysis (TGA) was obtained to analyze the thermal stability of materials. Fourier transform infrared (FTIR) and solid-state nuclear magnetic resonance spectroscopy (ssNMR) were employed to characterize functional groups and molecular structure. In addition, XPS was performed to determine the chemical states with the spectra of all samples. In order to analyze the recombination of charges and the charge transfer resistance, photoluminescence (PL) spectra and electrochemical impedance spectroscopy (EIS) were utilized. XPS-VB spectra were conducted to identify the valance band (VB) edge of the materials and Mott-Schottky plots were used to confirm the

position of the flat-band potential of the materials. Cyclic voltammetry (CV) and linear sweep voltammetry (LSV) were also performed in the study to study the electrocatalytic properties of the materials.

**Table S1.** Summary of the photocatalytic process for the production of H<sub>2</sub>O<sub>2</sub>

| Photocatalyst                                 | Light source                   | Experimental conditions    | H <sub>2</sub> O <sub>2</sub> yield | Ref.      |
|-----------------------------------------------|--------------------------------|----------------------------|-------------------------------------|-----------|
| GCN                                           |                                |                            | 460.8 μM                            |           |
| SCN                                           | Two 50 W Philips halogen lamps | Catalyst: 1 mg             | 393.7 μM                            | This work |
| p-SCN                                         |                                | Solvent: Water             | 725.8 μM                            |           |
|                                               |                                | SA: IPA                    | 661.1 μM                            |           |
| p-SeCN                                        |                                | Time: 90 min               |                                     |           |
|                                               |                                | Atmosphere: O <sub>2</sub> |                                     |           |
| SeCN                                          |                                |                            | 903.01 μM                           |           |
| C, O co-doped g-C <sub>3</sub> N <sub>4</sub> | 300 W Xenon arc lamp           | Catalyst: 100 mg           | 60.3 μmol                           | [1]       |
|                                               |                                | Solvent: Water             |                                     |           |
|                                               |                                | SA: IPA                    |                                     |           |
|                                               |                                | Time: 30 h                 |                                     |           |
|                                               |                                | Atmosphere: O <sub>2</sub> |                                     |           |
| B doped g-C <sub>3</sub> N <sub>4</sub> tubes | 300 W xenon lamp               | Catalyst: 50 mg            | 42.31 μM min <sup>-1</sup>          | [2]       |
|                                               |                                | Solvent: Water             |                                     |           |
| P doped g-C <sub>3</sub> N <sub>4</sub> tubes |                                | SA: IPA                    | 24.95 μM min <sup>-1</sup>          |           |

|                                                            |                                                                      |                            |  |                                            |     |
|------------------------------------------------------------|----------------------------------------------------------------------|----------------------------|--|--------------------------------------------|-----|
| S doped g-C <sub>3</sub> N <sub>4</sub> tubes              |                                                                      | Time: 120 min              |  | 24.22 $\mu\text{M min}^{-1}$               |     |
|                                                            |                                                                      | Atmosphere: O <sub>2</sub> |  |                                            |     |
| Ultra-thin g-C <sub>3</sub> N <sub>4</sub>                 | AM 1.5 (100 mW cm <sup>-2</sup> , 400 nm $\leq \lambda \leq$ 760 nm) | Catalyst: 20 mg            |  |                                            | [3] |
|                                                            |                                                                      | Solvent: Water             |  |                                            |     |
|                                                            |                                                                      | SA: IPA                    |  | 665.4 $\mu\text{mol h}^{-1} \text{g}^{-1}$ |     |
|                                                            |                                                                      | Time: 5 h                  |  |                                            |     |
|                                                            |                                                                      | Atmosphere: O <sub>2</sub> |  |                                            |     |
| K-, P-, O-, and S-co-doped g-C <sub>3</sub> N <sub>4</sub> | 300 W Xenon lamp                                                     | Catalyst: 150 mg           |  |                                            | [4] |
|                                                            |                                                                      | Solvent: Water             |  |                                            |     |
|                                                            |                                                                      | SA: IPA                    |  | 6231 $\mu\text{M}$                         |     |
|                                                            |                                                                      | Time: 180 min              |  |                                            |     |
|                                                            |                                                                      | Atmosphere: O <sub>2</sub> |  |                                            |     |
| Cl doped g-C <sub>3</sub> N <sub>4</sub> nanorods          | 250 W high-pressure sodium lamp                                      | Catalyst: 200 mg           |  |                                            | [5] |
|                                                            |                                                                      | Solvent: Water             |  | 0.35 $\text{mmol}\cdot\text{L}^{-1}$       |     |
|                                                            |                                                                      | SA: EDTA                   |  |                                            |     |
| Br doped g-C <sub>3</sub> N <sub>4</sub> nanorods          |                                                                      | Time: 6 h                  |  | 1.99 $\text{mmol}\cdot\text{L}^{-1}$       |     |
|                                                            |                                                                      | Atmosphere: O <sub>2</sub> |  |                                            |     |
| Ultrathin g-C <sub>3</sub> N <sub>4</sub> nanosheet        | Simulated sunlight irradiation system                                | Catalyst: 50 mg            |  |                                            | [6] |
|                                                            |                                                                      | Solvent: Water             |  | 1083 $\mu\text{mol g}^{-1}\text{h}^{-1}$   |     |
|                                                            |                                                                      | SA: Ethanol                |  |                                            |     |

|                                                         |                   |                            |                                      |      |
|---------------------------------------------------------|-------------------|----------------------------|--------------------------------------|------|
|                                                         |                   | Time: 180 min              |                                      |      |
|                                                         |                   | Atmosphere: O <sub>2</sub> |                                      |      |
| CN-vacancy-<br>doped<br>g-C <sub>3</sub> N <sub>4</sub> | 300 W Xenon lamp  | Catalyst: 50 mg            | 718.36                               | [7]  |
|                                                         |                   | Solvent: Water             | μmol g <sup>-1</sup> h <sup>-1</sup> |      |
|                                                         |                   | SA: IPA                    |                                      |      |
|                                                         |                   | Atmosphere: O <sub>2</sub> |                                      |      |
|                                                         |                   | Time: 60 min               |                                      |      |
| KOH doped<br>g-C <sub>3</sub> N <sub>4</sub>            | 500 W Xe arc lamp | Catalyst: 30 mg            | 704                                  | [8]  |
|                                                         |                   | Solvent: Water             | μmol g <sup>-1</sup> h <sup>-1</sup> |      |
|                                                         |                   | SA: IPA                    |                                      |      |
|                                                         |                   | Atmosphere: O <sub>2</sub> |                                      |      |
|                                                         |                   | Time: 240 min              |                                      |      |
| K and P doped<br>g-C <sub>3</sub> N <sub>4</sub>        | 300 W Xenon lamp  | Catalyst: 20 mg            | 216                                  |      |
|                                                         |                   | Solvent: Water             | μmol g <sup>-1</sup> h <sup>-1</sup> |      |
|                                                         |                   | SA: EtOH                   |                                      | [9]  |
|                                                         |                   | Atmosphere: O <sub>2</sub> |                                      |      |
| P doped g-C <sub>3</sub> N <sub>4</sub>                 | Blue LED light    | Catalyst: 50 mg            | 285.34                               |      |
|                                                         |                   | Solvent: Water             | μmol L <sup>-1</sup>                 |      |
|                                                         |                   | SA: Ethanol                |                                      | [10] |
|                                                         |                   | Atmosphere: O <sub>2</sub> |                                      |      |

|                                                  |                  |                            |                                      |      |
|--------------------------------------------------|------------------|----------------------------|--------------------------------------|------|
|                                                  |                  | Time: 180 min              |                                      |      |
| B and O co-doped g-C <sub>3</sub> N <sub>4</sub> | 300 W Xenon lamp | Catalyst: 40 mg            | 620                                  |      |
|                                                  |                  | Solvent: Water             | $\mu\text{mol g}^{-1} \text{h}^{-1}$ |      |
|                                                  |                  | SA: Ethanol                |                                      | [11] |
|                                                  |                  | Atmosphere: O <sub>2</sub> |                                      |      |
|                                                  |                  | Time: 150 min              |                                      |      |
| O doped g-C <sub>3</sub> N <sub>4</sub>          | 300 W Xenon lamp | Catalyst: 50 mg            | 2008.4                               | [12] |
|                                                  |                  | Solvent: Water             | $\mu\text{mol g}^{-1} \text{h}^{-1}$ |      |
|                                                  |                  | SA: Isopropanol            |                                      |      |
|                                                  |                  | Atmosphere: O <sub>2</sub> |                                      |      |

**Table S2.** Elemental percentage as-prepared samples

| Sample | C                  | N                  | O                 | Cl                | X                 |       |
|--------|--------------------|--------------------|-------------------|-------------------|-------------------|-------|
|        |                    |                    |                   |                   | (Se)              |       |
| GCN    | 44.78 <sup>a</sup> | 53.77 <sup>a</sup> | 1.35 <sup>a</sup> | 0.1 <sup>a</sup>  | -                 | -     |
| SCN    | 43.96 <sup>a</sup> | 53.9 <sup>a</sup>  | 1.83 <sup>a</sup> | 0.12 <sup>a</sup> | 0.19 <sup>a</sup> | -     |
| p-SCN  | 44.36 <sup>a</sup> | 52.89 <sup>a</sup> | 1.91 <sup>a</sup> | 0.36 <sup>a</sup> | 0.27 <sup>a</sup> | -     |
| p-SeCN | 44.53 <sup>a</sup> | 54.29 <sup>a</sup> | 1.06 <sup>a</sup> | 0.11 <sup>a</sup> | 0.01 <sup>a</sup> | 0.199 |
| SeCN   | 44.17 <sup>a</sup> | 53.9 <sup>a</sup>  | 1.69 <sup>a</sup> | 0.16 <sup>a</sup> | 0.08 <sup>a</sup> | 0.08  |

<sup>a</sup>Data was obtained from XPS results

<sup>b</sup>Data was obtained from ICP-MS results

**Table S3.** Physical properties of all samples

| Samples | Zeta potential (mV) | Conductivity (mS/cm) | Surface Active Area (m <sup>2</sup> g <sup>-1</sup> ) | Pore Volume (cm <sup>3</sup> g <sup>-1</sup> ) | Average Pore Size (nm) | d-spacing (nm) |       | Average Crystallite Site (nm) |
|---------|---------------------|----------------------|-------------------------------------------------------|------------------------------------------------|------------------------|----------------|-------|-------------------------------|
|         |                     |                      |                                                       |                                                |                        | (100)          | (002) |                               |
| GCN     | - 31.6              | 0.00604              | 51.136                                                | 0.222                                          | 3.4710                 | 0.679          | 0.326 | 3.939                         |
| SCN     | - 28.2              | 0.00824              | 57.224                                                | 0.277                                          | 3.5628                 | 0.684          | 0.323 | 9.198                         |
| p-SCN   | - 34.4              | 0.0057               | 54.822                                                | 0.243                                          | 3.5199                 | 0.684          | 0.322 | 10.490                        |
| p-SeCN  | - 34.3              | 0.0449               | 52.142                                                | 0.268                                          | 3.4657                 | 0.690          | 0.323 | 9.642                         |
| SeCN    | - 31.2              | 0.00810              | 58.076                                                | 0.304                                          | 4.0406                 | 0.690          | 0.323 | 9.664                         |

**Table S4.** Calculations of the delocalized  $\pi$ - $\pi^*$  electron systems based on XPS data

| Sample | $(\pi$ - $\pi^*)/C_{\text{total}}$ | $(\pi$ - $\pi^*)/N_{\text{total}}$ | N-(C <sub>3</sub> )/C=N-C |
|--------|------------------------------------|------------------------------------|---------------------------|
| GCN    | 0.046                              | 0.083                              | 0.199                     |
| SCN    | 0.046                              | 0.212                              | 0.199                     |
| p-SCN  | 0.078                              | 0.084                              | 0.346                     |
| p-SeCN | 0.059                              | 0.059                              | 0.341                     |
| SeCN   | 0.058                              | 0.079                              | 0.265                     |

**Table S5.** Electronic properties of as-synthesized materials

| <b>Samples</b> | <b>Bandgap Energy (eV)</b> | <b>Valance Band Edge Energy (eV)</b> | <b>Valance Band Potential (eV)</b> | <b>Flat Band Potential (eV)</b> | <b>Work function (eV)</b> | <b>Conduction Band Potential (eV)</b> |                     |
|----------------|----------------------------|--------------------------------------|------------------------------------|---------------------------------|---------------------------|---------------------------------------|---------------------|
| GCN            | 2.68                       | 2.03 <sup>a</sup>                    | 1.47 <sup>a</sup>                  | -1.327 <sup>b</sup>             | 5.630                     | -1.21 <sup>a</sup>                    | -1.230 <sup>b</sup> |
| SCN            | 2.67                       | 2.05 <sup>a</sup>                    | 1.49 <sup>a</sup>                  | -1.314 <sup>b</sup>             | 5.617                     | -1.18 <sup>a</sup>                    | -1.217 <sup>b</sup> |
| p-SCN          | 2.62                       | 1.95 <sup>a</sup>                    | 1.39 <sup>a</sup>                  | -1.319 <sup>b</sup>             | 5.622                     | -1.23 <sup>a</sup>                    | -1.222 <sup>b</sup> |
| p-SeCN         | 2.71                       | 2.08 <sup>a</sup>                    | 1.52 <sup>a</sup>                  | -1.302 <sup>b</sup>             | 5.605                     | -1.19 <sup>a</sup>                    | -1.205 <sup>b</sup> |
| SeCN           | 2.61                       | 2.06 <sup>a</sup>                    | 1.50 <sup>a</sup>                  | -1.239 <sup>b</sup>             | 5.542                     | -1.11 <sup>a</sup>                    | -1.142 <sup>b</sup> |

<sup>a</sup> Data and values were exported and computed from XPS-VB results

<sup>b</sup> Data and values were exported and computed from Mott Schottky plots



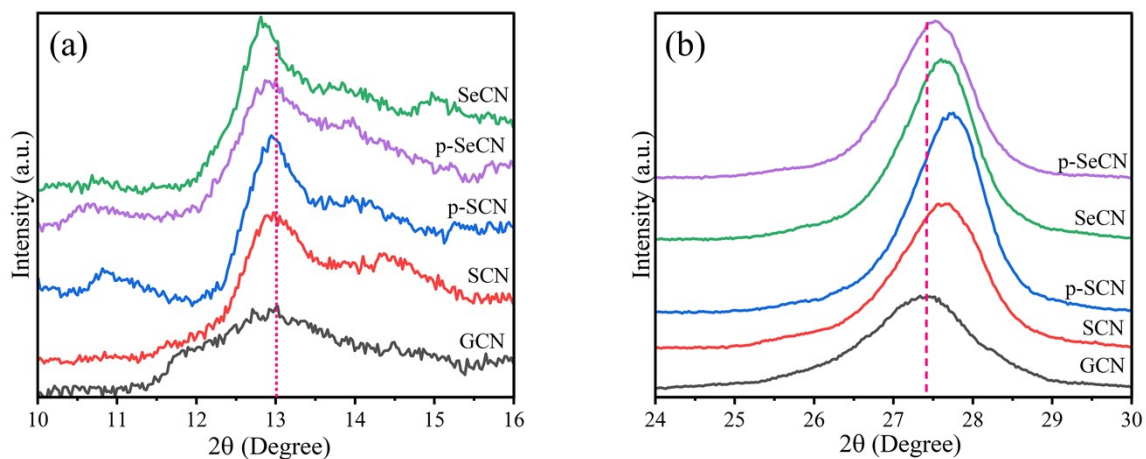

**Fig. S1.** XRD patterns of as-prepared materials from 10 to 16 degree (a), and from 24 to 30 degree (b)

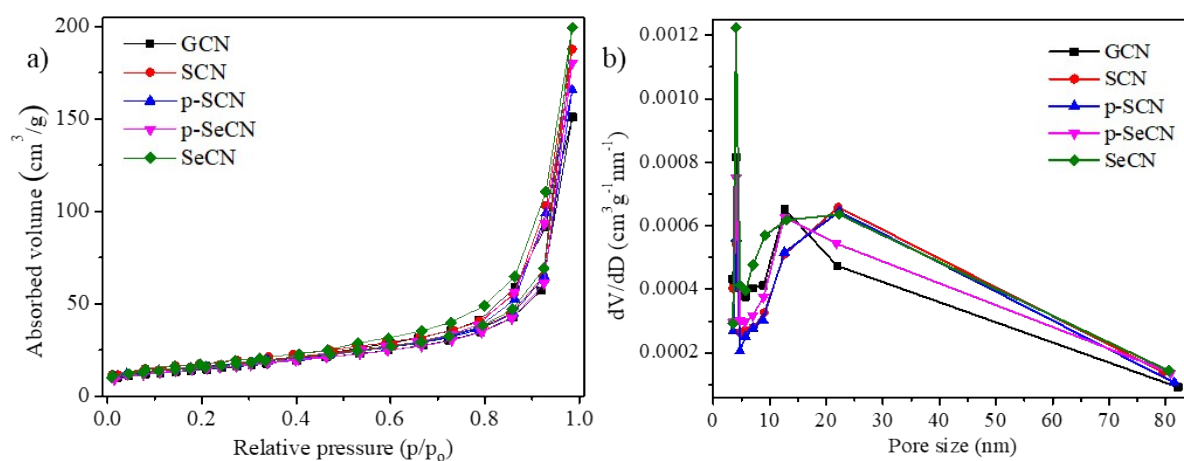

**Fig. S2.** N<sub>2</sub> adsorption-desorption isotherms of samples and (b) the pore size distribution curves of GCN, SCN, p-SCN, p-SeCN, and SeCN

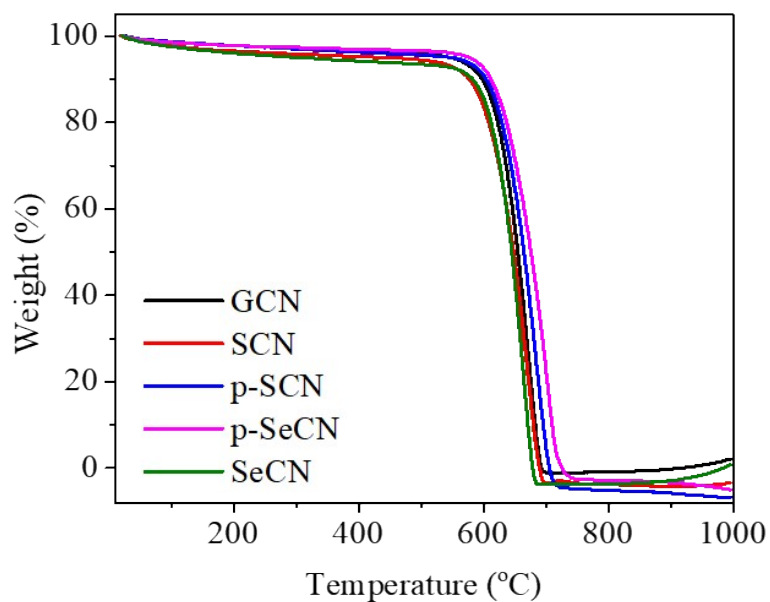

**Fig. S3.** TGA curves for GCN, SCN, p-SCN, p-SeCN, and SeCN

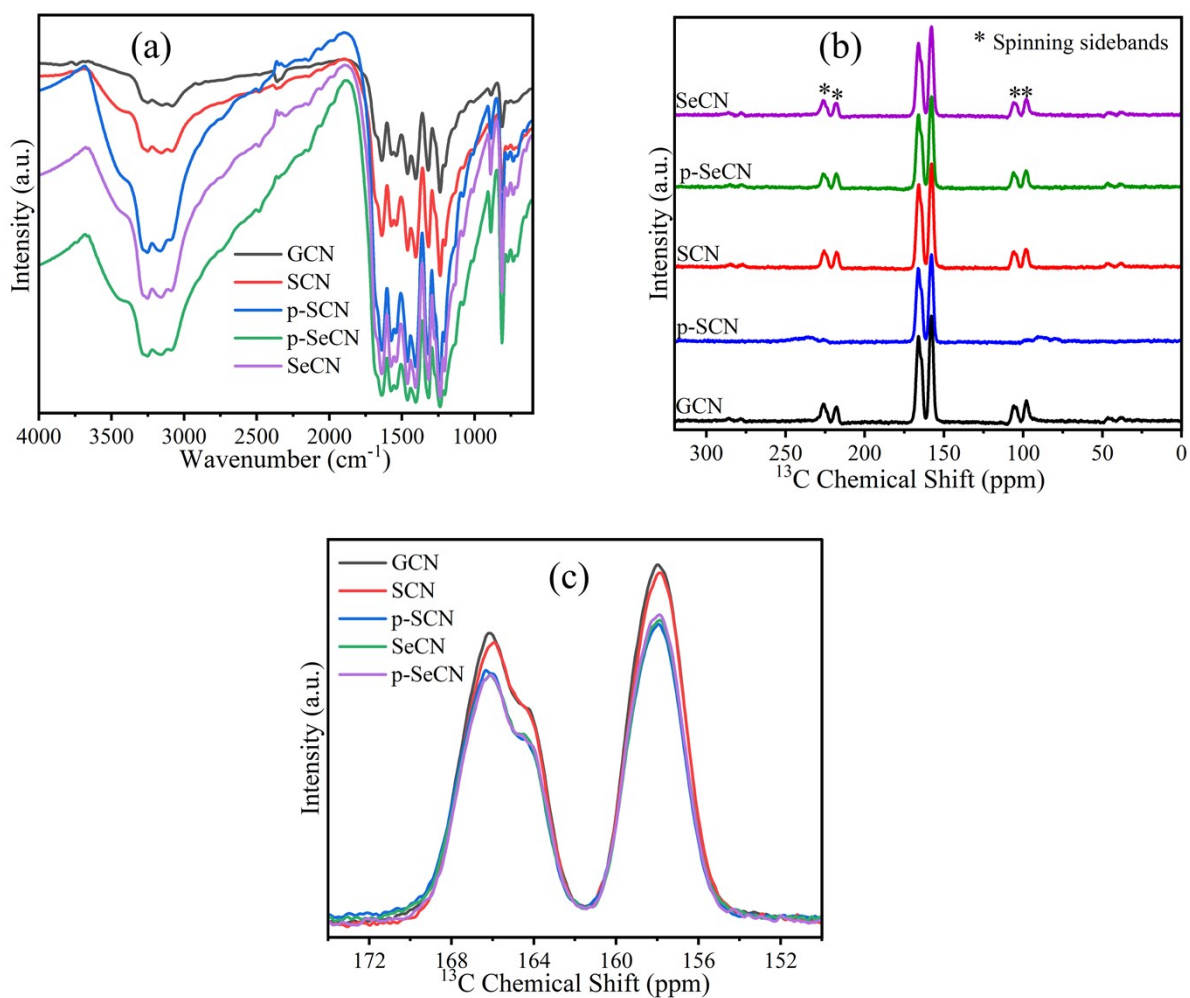

**Fig. S4.** FTIR (a) and  $^{13}\text{C}$  solid-state NMR (b) and (c) spectra of the materials

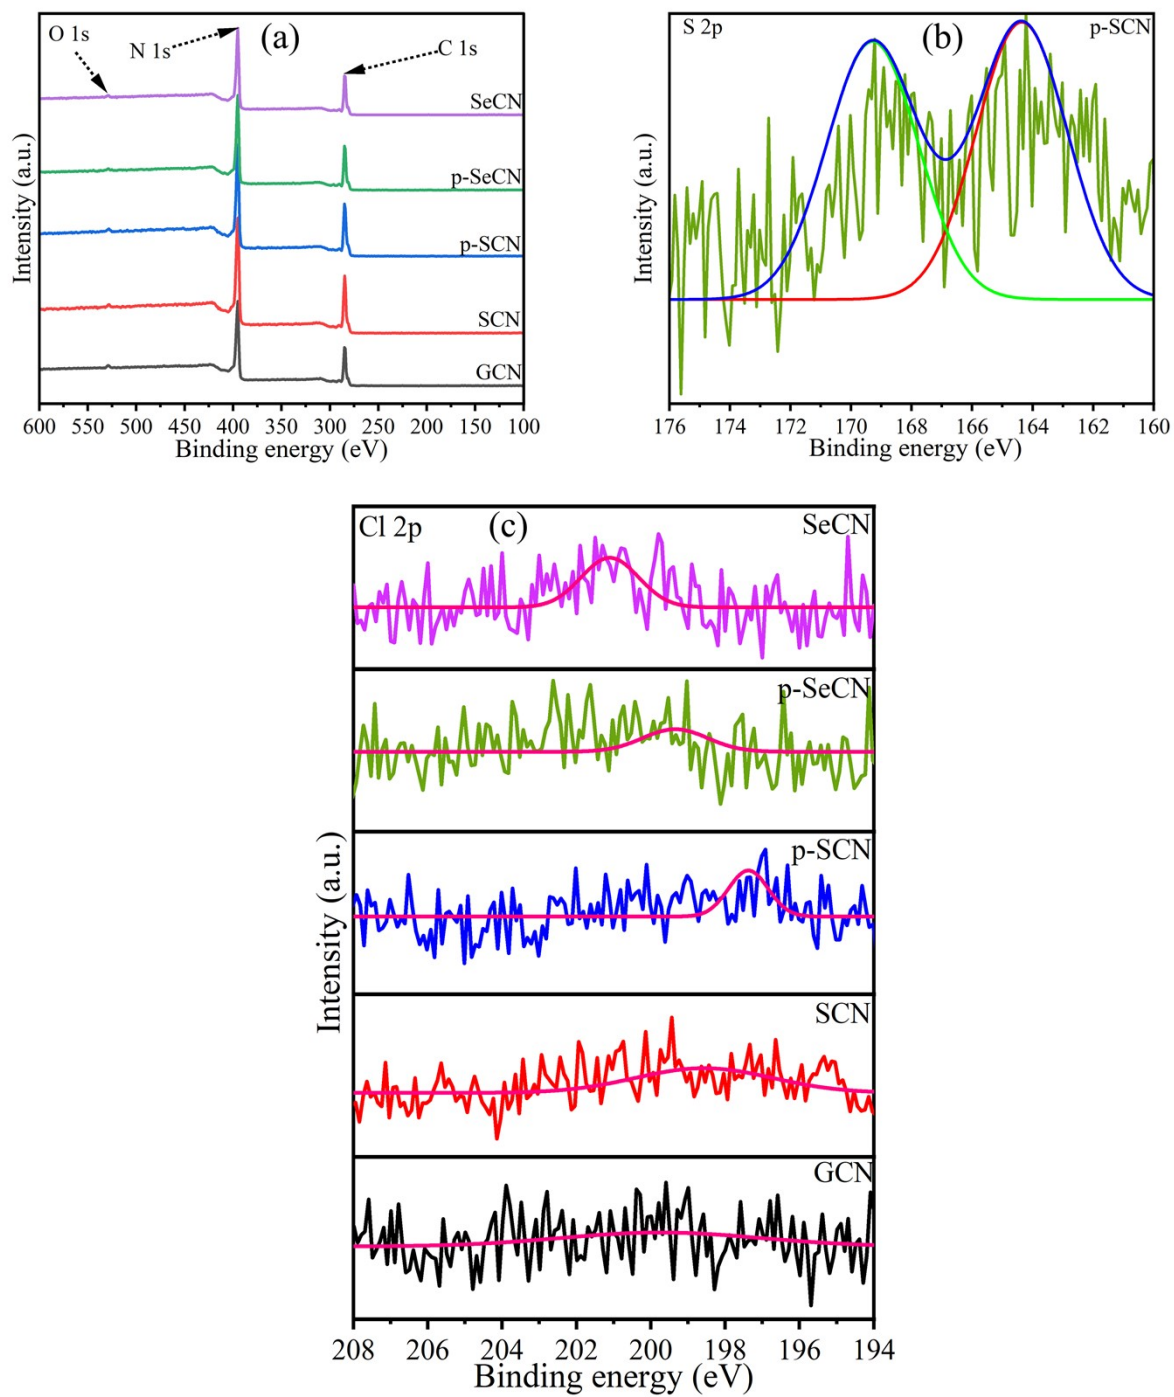

**Fig. S5.** XPS survey spectra of materials

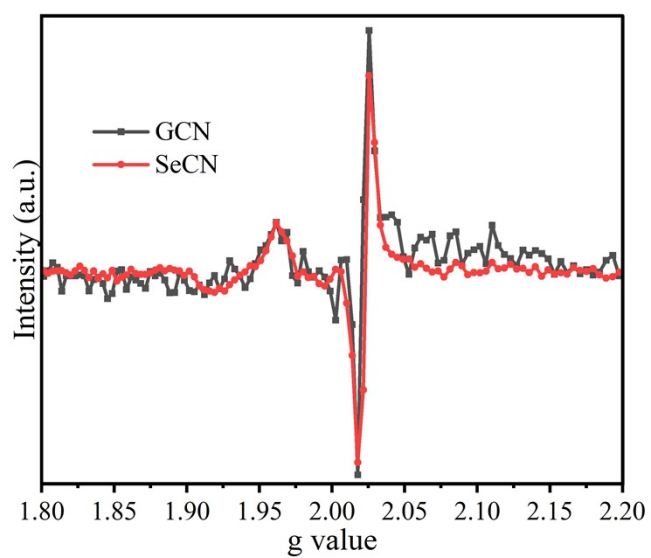

**Fig. S6.** EPR spectra of GCN and SeCN

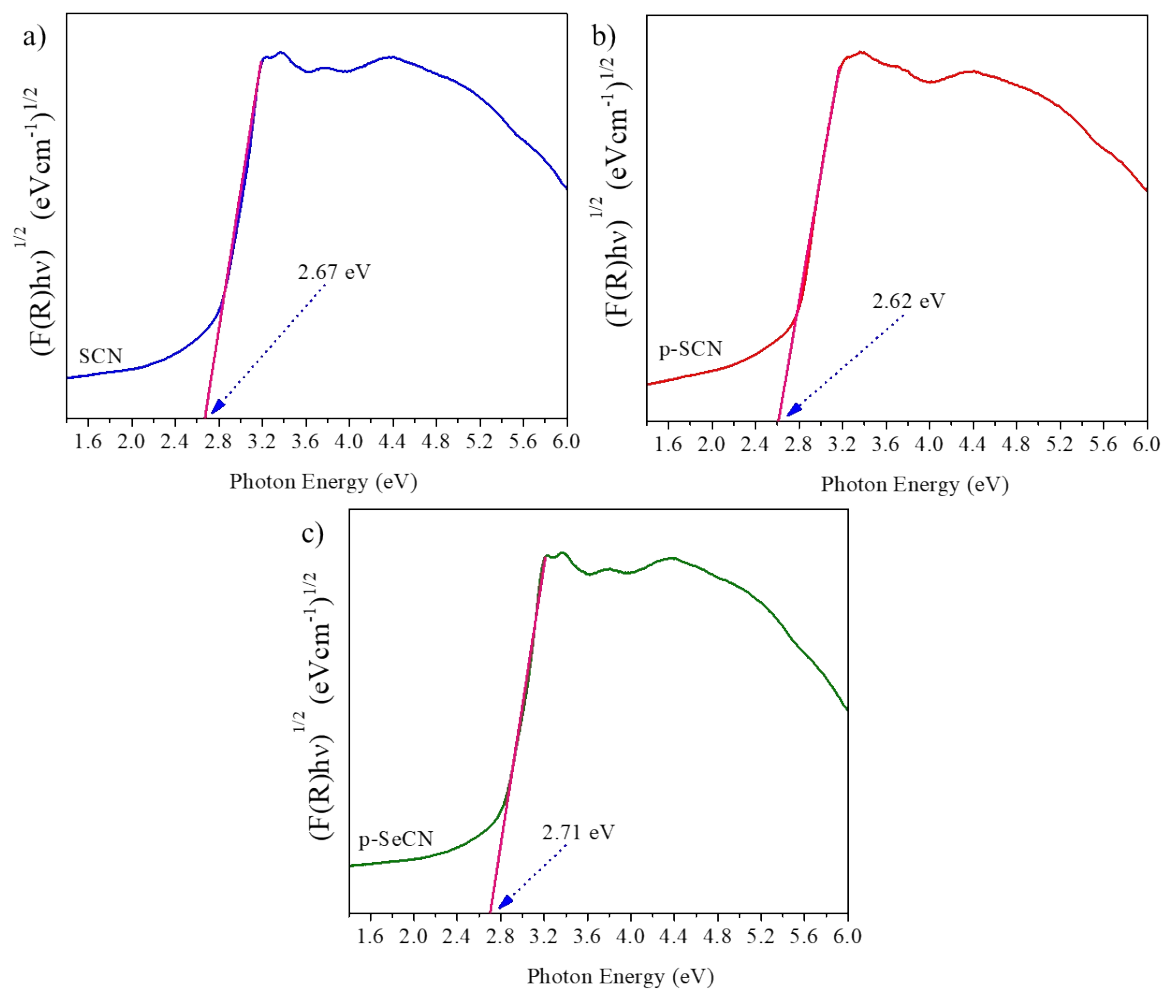

**Fig. S7.** Bandgap energy of SCN (a), p-SCN (b), and p-SeCN (c)

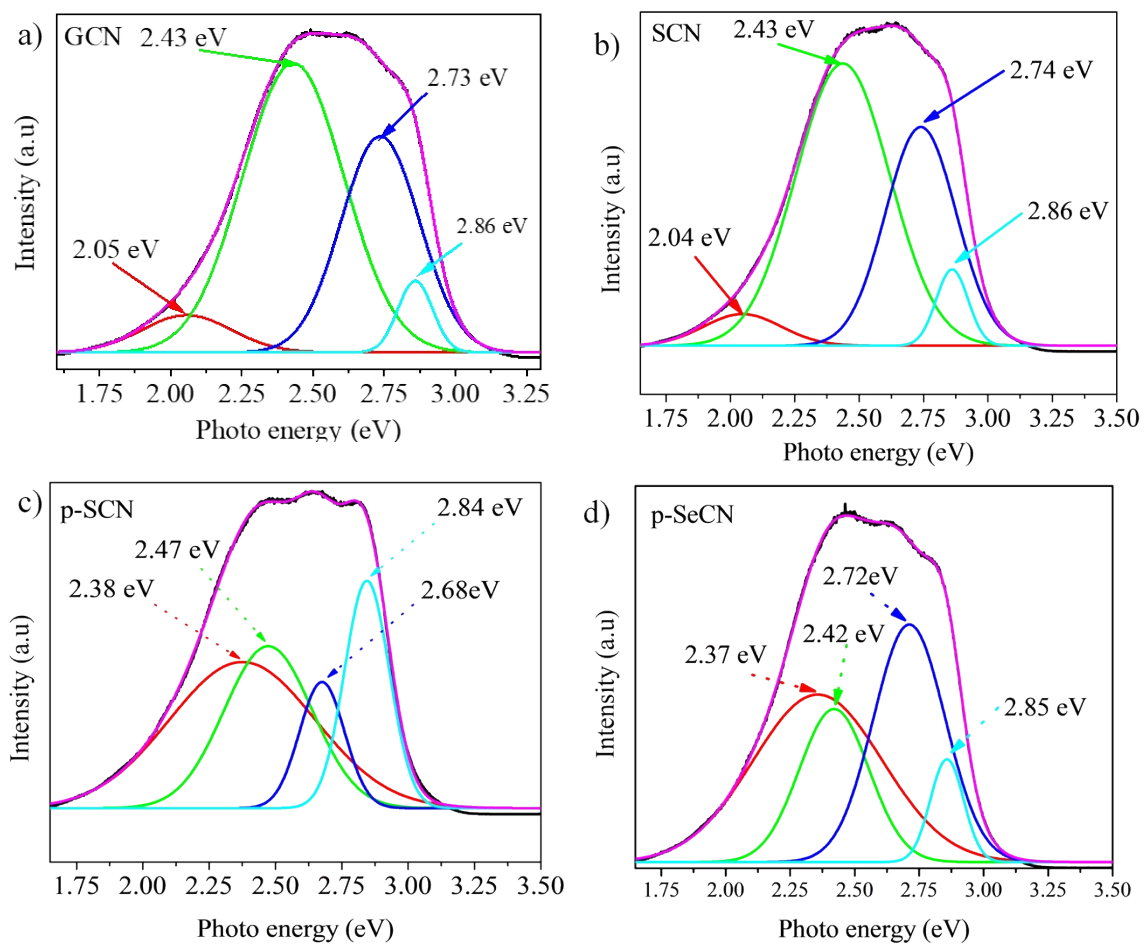

**Fig. S8.** PL energy of GCN (a), SCN (b), p-SCN (c), and p-SeCN (d)

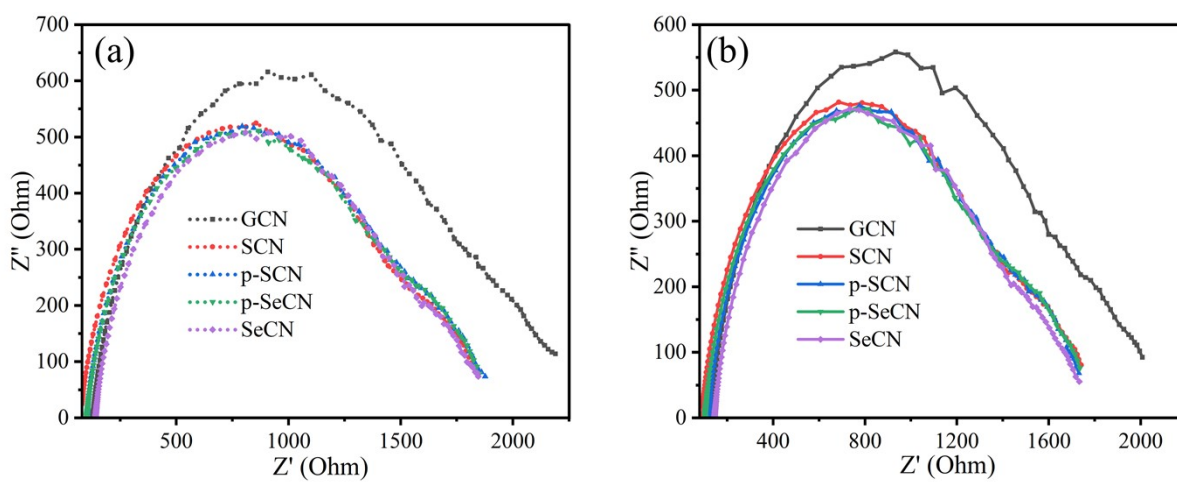

**Fig. S9.** EIS of GCN, SCN, p-SCN, p-SeCN, and SeCN

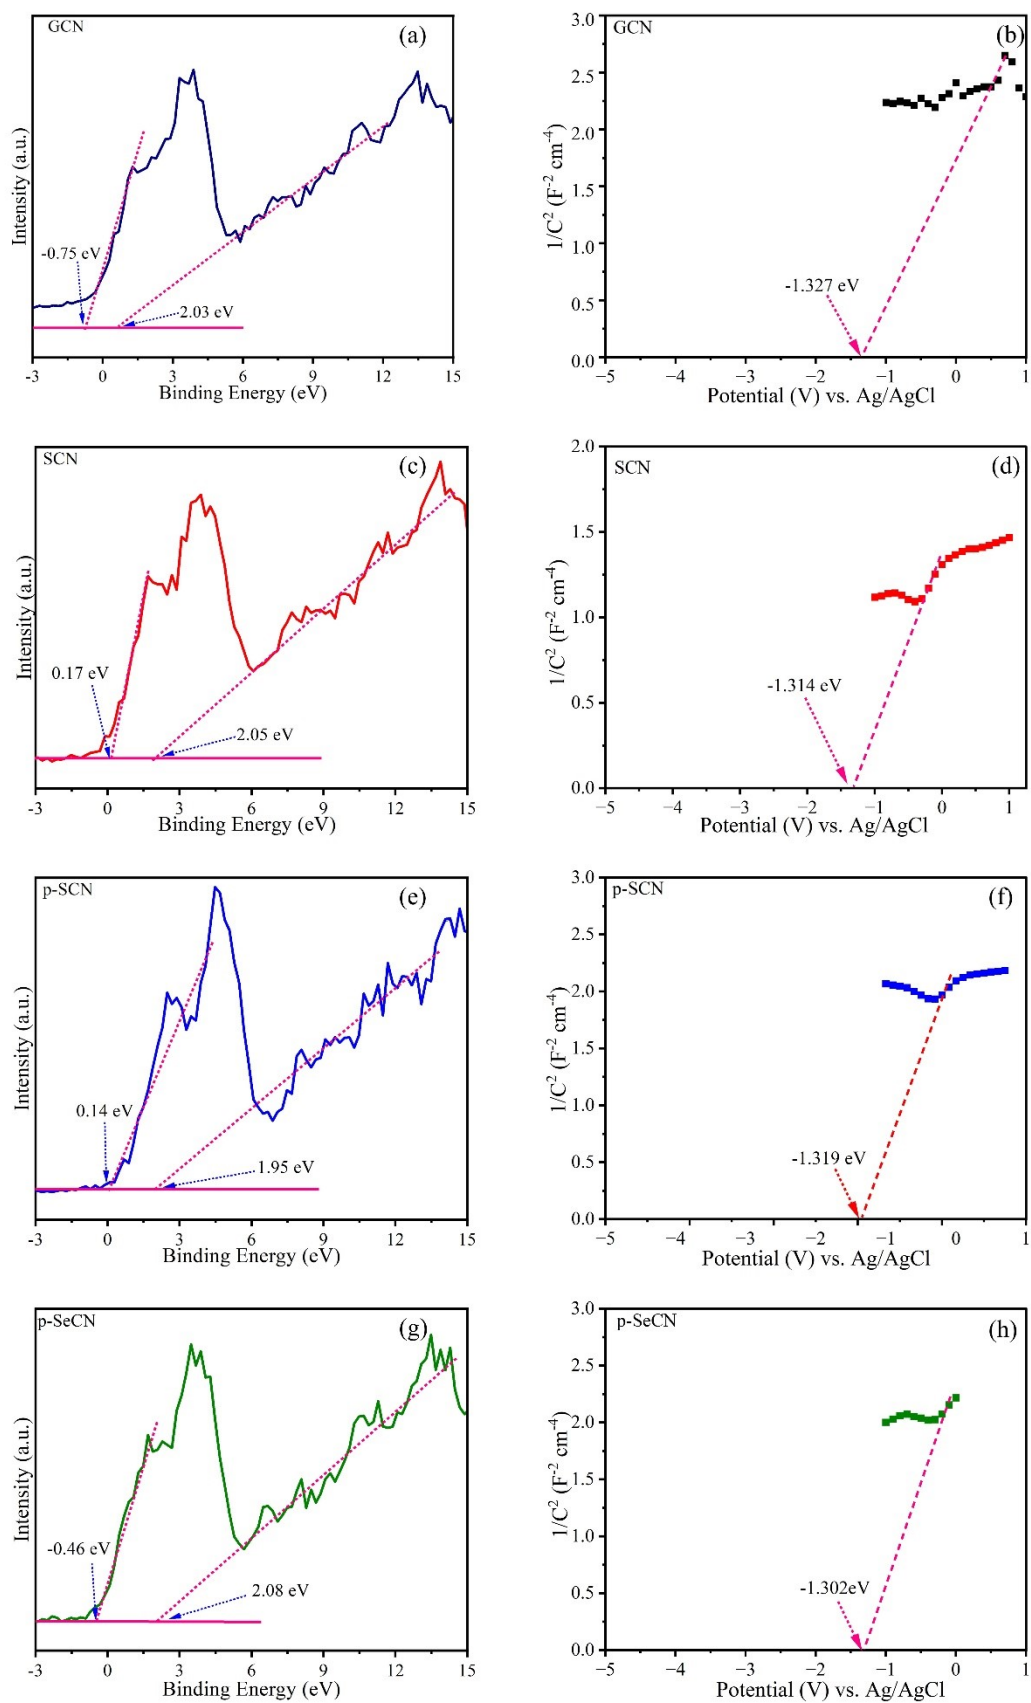

**Fig. S10.** XPS-VB and Mott Schottky plots of (a-b) GCN, (c-d) SCN, (e-f) p-SCN, and (g-h) p-SeCN

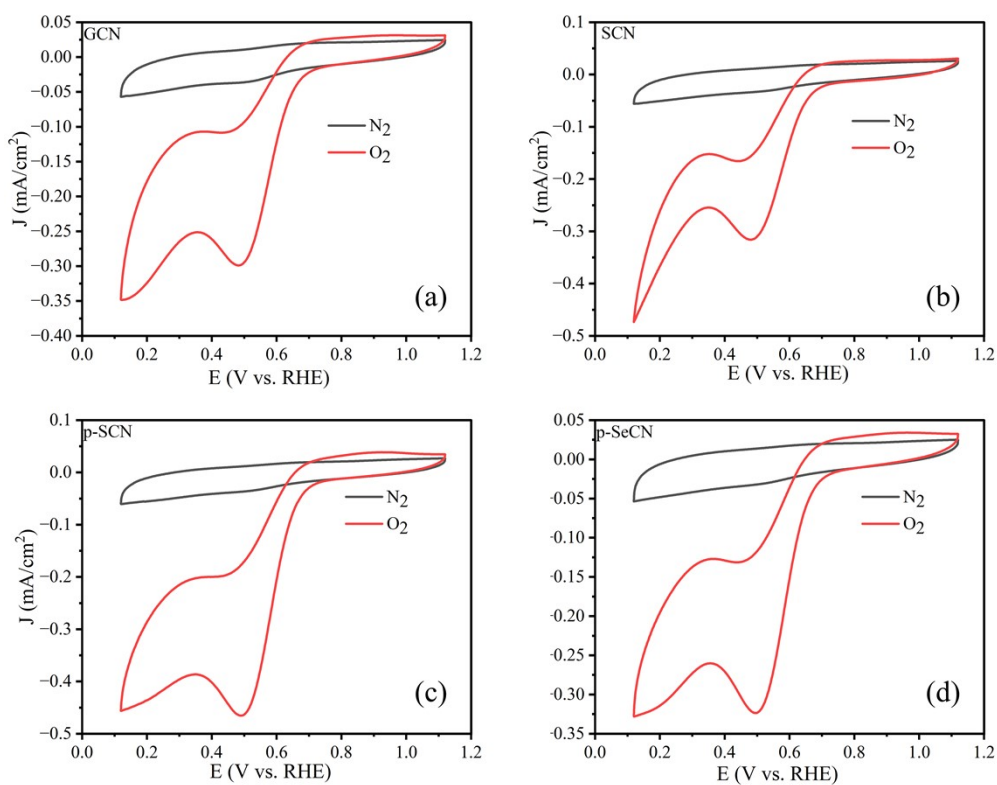

**Fig. S11.** CV curves of GCN (a), SCN (b), p-SCN (c), and p-SeCN (d)

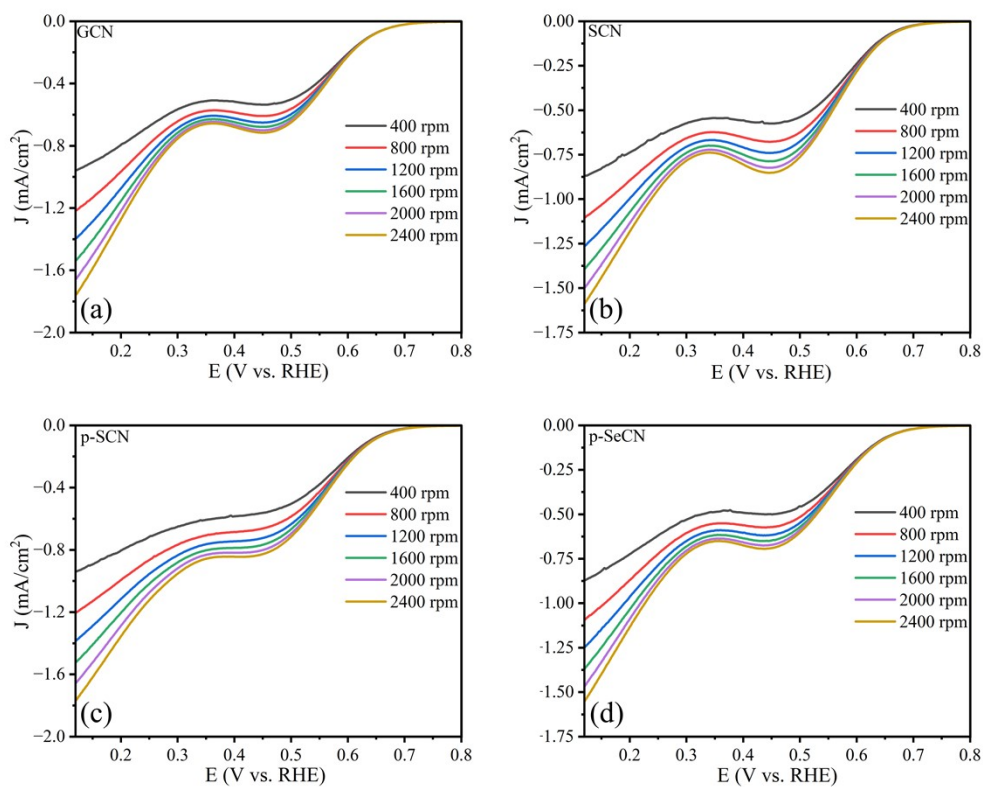

**Fig. S12.** LSV curves of GCN (a), SCN (b), p-SCN (c), and p-SeCN (d)

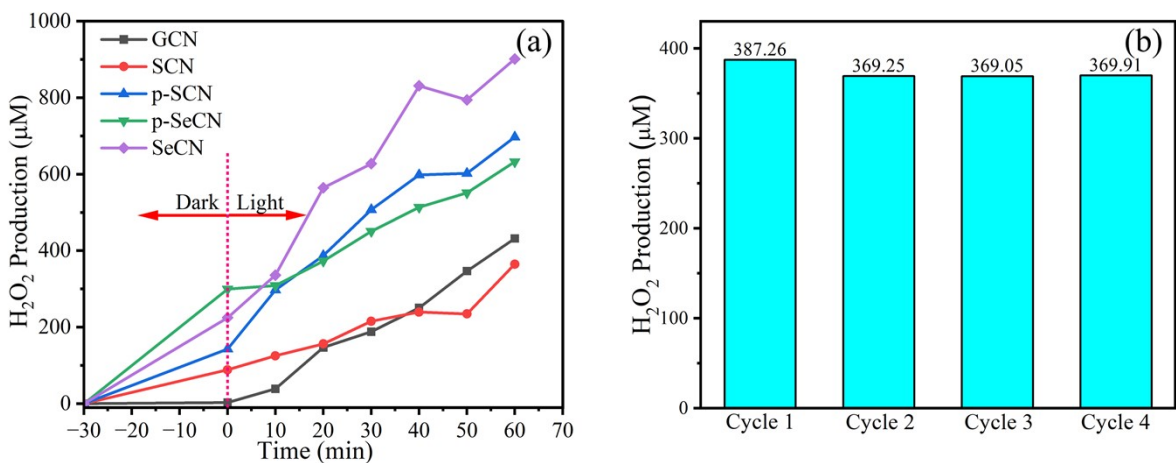

**Fig. S13.** (a) Piezo-photocatalytic H<sub>2</sub>O<sub>2</sub> production of as-prepared samples and (b) the cycle test of 50 mg of SeCN under 1 h irradiation

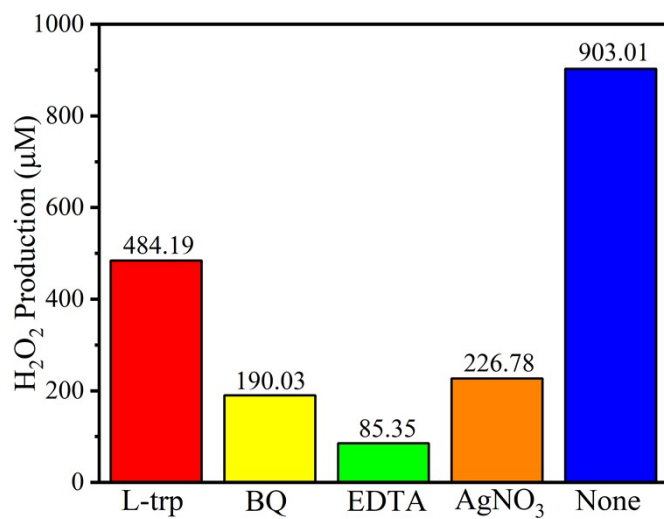

**Fig. S14.** Piezo-photocatalytic results of SeCN with the presence of a scavenger



## References

- [1] Samanta, S.; Yadav, R.; Kumar, A.; Sinha, A. K.; and Srivastava, R. *Appl. Catal. B*, 2019, **259**, 118054.
- [2] Liu, Y.; Zheng, Y.; Zhang, W.; Peng, Z.; Xie, H.; Wang, Y.; Huang, Y. *J. Mater. Sci. Technol.*, 2021, **95**, 127-135.
- [3] Hu, J.; Zhang, P.; Yang, T.; Cai, Y.; Qu, J.; Yang, X. *Appl. Surf. Sci.*, 2022, **576**, 151841.
- [4] Deng, L.; Sun, J.; Sun, J.; Wang, X.; Shen, T.; Zhao, R.; Wang, B. *Appl. Surf. Sci.*, 2022, 153586.
- [5] Zhang, C.; Bai, J.; Ma, L.; Wang, F.; Zhang, X.; Hu, S. *Diamond Relat. Mater.*, 2018, **87**, 215-222.
- [6] Zhou, L.; Feng, J.; Qiu, B.; Zhou, Y.; Lei, J.; Xing, Z.; Zhang, J. *Appl. Catal. B*, 2020, **267**, 118396.
- [7] Zhang, Z.; Zheng, Y.; Xie, H.; Zhao, J.; Guo, X.; Zhang, W.; Huang, Y. *J. Alloys Compd.*, 2022, **904**, 164028.
- [8] Zhang, H.; Jia, L.; Wu, P.; Xu, R.; He, J.; Jiang, W. *Appl. Surf. Sci.*, 2020, **527**, 146584.
- [9] Fattahimoghaddam, H.; Mahvelati-Shamsabadi, T.; Jeong, C. S.; Lee, B. K. *J. Colloid Interface Sci.*, 2022, **617**, 326-340.
- [10] Li, D.; Wen, C.; Huang, J.; Zhong, J.; Chen, P.; Liu, H.; Liu, G. *Appl. Catal. B*, 2022, **307**, 121099.
- [11] You, Q.; Zhang, C.; Cao, M.; Wang, B.; Huang, J.; Wang, Y.; Yu, G. *Appl. Catal. B*, 2023, **321**, 121941.

[12] Xie, H.; Zheng, Y.; Guo, X.; Liu, Y.; Zhang, Z.; Zhao, J.; Huang, Y. *ACS Sustainable Chem. Eng.*, 2021, **9**, 6788-6798.
